# Supplementary material
Source: Springer Nature journal article supplement (https://www.springermedizin.de/resource/supplementary/12879_2013_3030_MOESM3_ESM.pdf/9446840)

**IL-1 $\beta$ /IL-1 receptor-antagonist ratio (Symptomatic)**

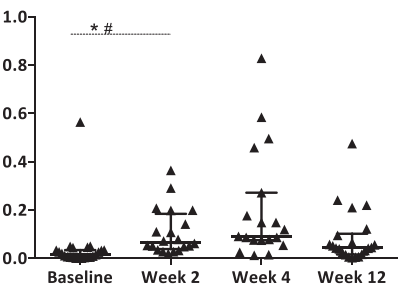

**IL-1 $\beta$ /IL-1 receptor-antagonist ratio (Control)**

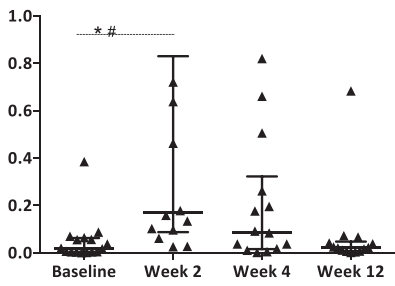

**IL-1 $\beta$ /sIL-1 receptor-I ratio (Symptomatic)**

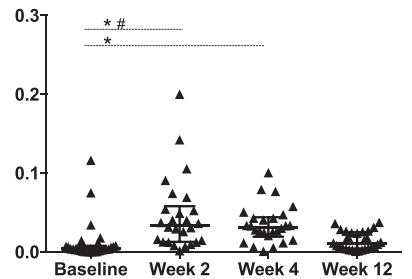

**IL-1 $\beta$ /sIL-1 receptor-I ratio (Control)**

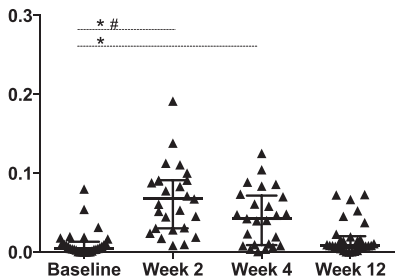

**IL-2/sIL-2 receptor- $\alpha$  ratio (Symptomatic)**

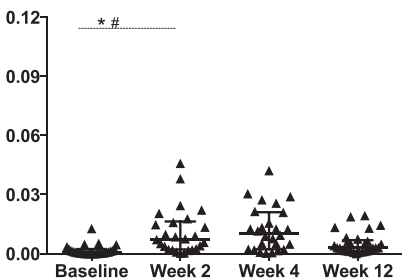

**IL-2/sIL-2 receptor- $\alpha$  ratio (Control)**

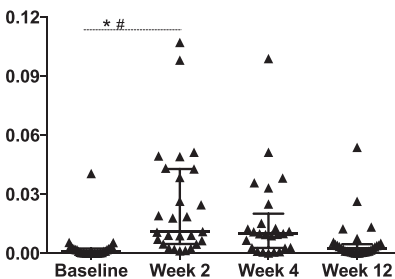

**TNF $\alpha$ /IL-4 ratio (Symptomatic)**

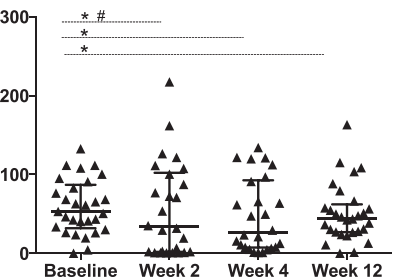

**TNF $\alpha$ /IL-4 ratio (Control)**

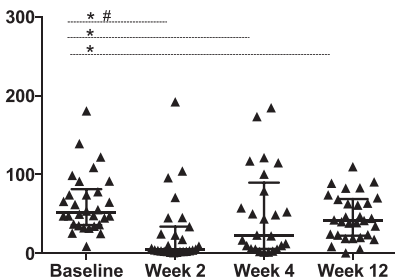

Supplement: MOESM3 [file 9446840]
